# Supplementary material
Source: MDPI journal article supplement (https://www.mdpi.com/2073-4441/10/8/1058)

**Supplementary figure 1.** Correlation between the minimum (a) and maximum (b) relative differences ( $\delta_{it}$ ) of TSWC during the 15-month test period, and the average value of monthly TSWC ( $\theta_0$ , % vol.) in the four vineyards.

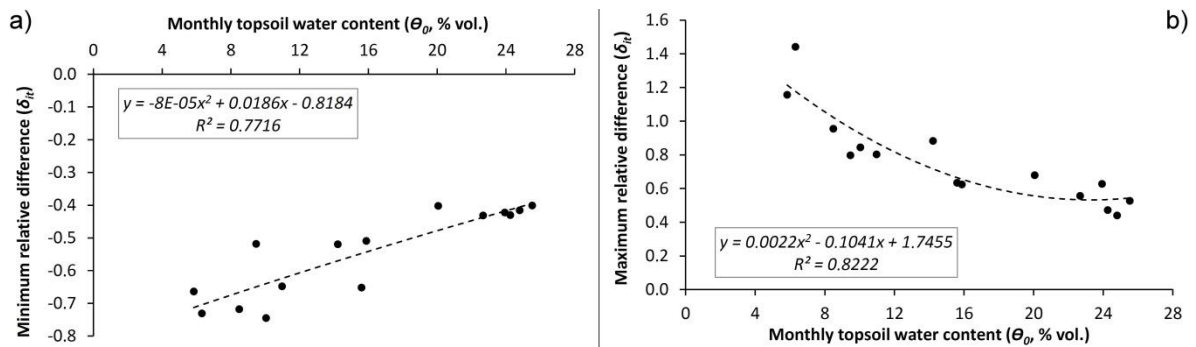

**Supplementary figure 2.** Evolution of the observed values of runoff (Q) and sediment (SY) yields in the two sediment traps (ST) during the 15-month test period. The average sediment concentration is also shown.

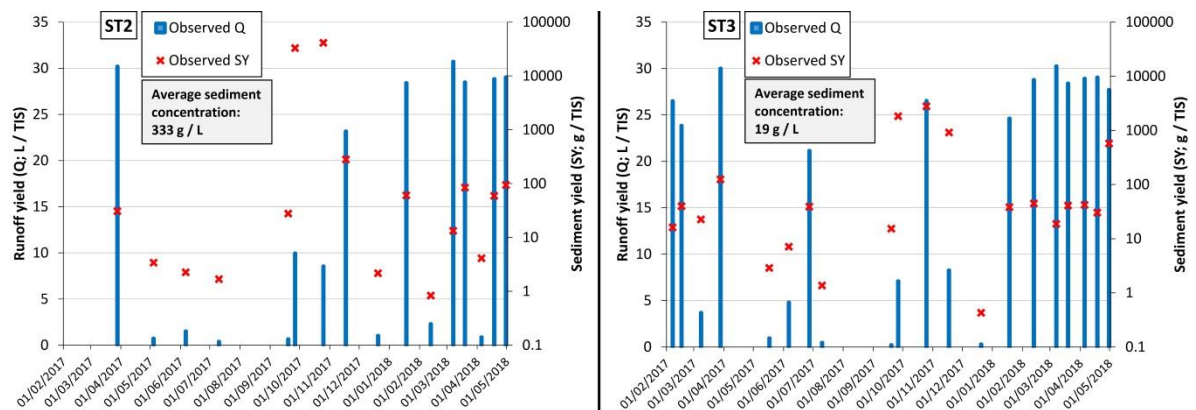

Supplement: s1 [file s1]
